# Supplementary material
Source: MDPI journal article supplement (https://www.mdpi.com/search?q=viruses-07-01902)
Supplement: s001 [file viruses-07-01902-s001.pdf]

# Supplementary

**Table S1.** Samples used in the study.

| Sample | Sampling Date | Source        | Type            | Density, g mL <sup>-1</sup> |      |
|--------|---------------|---------------|-----------------|-----------------------------|------|
| SSII   | SS6           | November 2009 | Salt field *    | Salt (fine grind)           |      |
|        | SS7           |               | Salt field *    | Salt (large crystals)       |      |
|        | SS8           |               | Salt field **   | Salt crystals               |      |
|        | SS9           |               | Saltern pond ** | Salt water and mud          | 1.15 |
| SSIII  | SS10          | December 2010 | Salt field *    | Salt (fine grind)           |      |
|        | SS11          |               | Saltern pond ** | Salt water                  | 1.02 |
|        | SS12          |               | Saltern pond ** | Salt water                  | 1.05 |
|        | SS13          |               | Salt field **   | Salt crystals               |      |

\*Collected and rinsed by Samut Sakhon saltern personnel; \*\*Collected by Academy Professor D. Bamford.

**Table S2.** Bacterial strains isolated and used in this study.

| Sample <sup>a</sup> | Strain                           | 16S rRNA Gene Partial Sequence<br>GenBank Acc. No. and Length (bp) |
|---------------------|----------------------------------|--------------------------------------------------------------------|
| SSII                | <i>Rhodovibrio</i> sp. SS9-9     | KM019181 (498)                                                     |
| SSIII               | <i>Halobacillus</i> sp. SS10-1   | KM019182 (515)                                                     |
| SSIII               | <i>Halobacillus</i> sp. SS10-2   | KM019183 (545)                                                     |
| SSIII               | <i>Halobacillus</i> sp. SS10-8   | KM019184 (545)                                                     |
| SSIII               | <i>Pontibacillus</i> sp. SS11-1  | KM019185 (872)                                                     |
| SSIII               | <i>Halobacillus</i> sp. SS11-2   | KM019186 (819)                                                     |
| SSIII               | <i>Halobacillus</i> sp. SS11-4   | KM019187 (966)                                                     |
| SSIII               | <i>Halobacillus</i> sp. SS12-1   | KM019188 (514)                                                     |
| SSIII               | <i>Halobacillus</i> sp. SS12-2   | KM019189 (526)                                                     |
| SSIII               | <i>Halobacillus</i> sp. SS12-3   | KM019190 (703)                                                     |
| SSIII               | <i>Pontibacillus</i> sp. SS13-1  | KM019191 (531)                                                     |
| SSIII               | <i>Halobacillus</i> sp. SS13-2   | KM019192 (556)                                                     |
| SSIII               | <i>Pontibacillus</i> sp. SS13-3  | KM019193 (506)                                                     |
| SSIII               | <i>Sedimibacillus</i> sp. SS13-9 | KM019194 (627)                                                     |
| SSIII               | <i>Pontibacillus</i> sp. SS13-15 | KM019195 (883)                                                     |

a. SSII, Samut Sakhon sample 2009; SSIII, Samut Sakhon sample 2010.

**Table S3.** Host range of SSIII virus isolates with unknown morphology.

| Virus Isolate Number                      | 37                | 38                | 39                | 40                | 41                | 42                | 43                | 44                | 45                |
|-------------------------------------------|-------------------|-------------------|-------------------|-------------------|-------------------|-------------------|-------------------|-------------------|-------------------|
| Initial stock titer, PFU ml <sup>-1</sup> | $1.8 \times 10^8$ | $1.3 \times 10^6$ | $2.9 \times 10^7$ | $1.5 \times 10^8$ | $1.6 \times 10^7$ | $1.7 \times 10^7$ | $6.2 \times 10^9$ | $1.2 \times 10^6$ | $1.7 \times 10^6$ |
| Host strain                               |                   |                   |                   |                   |                   |                   |                   |                   |                   |
| <i>Halorubrum</i> sp. SS10-3              |                   |                   |                   |                   |                   |                   | -2                |                   |                   |
| <i>Halorubrum</i> sp. SS10-9              | 1 <sup>a</sup>    | -1                | 1                 | 1                 | 1                 | 1                 | 1                 |                   | -2                |
| <i>Haloarcula</i> sp. SS13-14             |                   |                   |                   |                   |                   |                   |                   |                   | H                 |
| <i>Halorubrum</i> sp. SS6-2               | 1                 | -1                | 1                 | 1                 |                   | 1                 | 1                 |                   | 1                 |
| <i>Halobacterium</i> sp. SS6-4            |                   |                   |                   |                   |                   |                   |                   |                   |                   |
| <i>Halobacterium</i> sp. SS6-5            | -1                |                   | -1                |                   | 1                 | -2                | -5                |                   | -2                |
| <i>Halorubrum</i> sp. SS7-4               | +1                | -1                | -2                | -1                | -2                | -2                | +1                | -1                | +2                |
| <i>Halorubrum</i> sp. SS8-2               | -1                | -2                |                   | -2                | 1                 |                   | -5                | -4                | +1                |
| <i>Haloarcula</i> sp. SS8-4               |                   |                   |                   |                   |                   | -2                |                   |                   |                   |
| <i>Halorubrum</i> sp. SS8-7               | 1                 | -1                | 1                 |                   |                   | 1                 |                   |                   |                   |
| <i>Halorubrum</i> sp. SS9-12              | -1                | -2                |                   |                   | 1                 | 1                 | -1                | -1                |                   |
| <i>Halorubrum</i> sp. SP3-3               | -1                | -2                | 1                 | 1                 |                   | 1                 | -1                |                   |                   |
| <i>Halorubrum</i> sp. SS1-3               | -1                | -1                | 1                 | -2                | 1                 | 1                 | 1                 | -3                | 1                 |
| <i>Har. japonica</i>                      |                   |                   |                   |                   |                   |                   |                   | H                 |                   |
| <i>Hrr. sodomense</i>                     | H                 | H                 | H                 | H                 | H                 | H                 | H                 |                   |                   |

a: The efficiency of plating (EOP) of the virus on its original host has been set to one and marked with H. Number 1 is equal to the EOP on the original host. Numbers -1, -2,... refer to  $10^{-1}$ ,  $10^{-2}$ ,... and +1, +2,... refer to  $10^1$ ,  $10^2$ ,... when compared to the EOP on the original host.

Table S4. Host range of myoviruses and siphoviruses.

| Morphotype                        | Myoviruses      |         |         |         |         |        |         |         |         |         |         |         |         |         |        |        |        |        |         |         |         |         |         |         |        | Siphoviruses         |                      |         |         |        |         |    |   |    |
|-----------------------------------|-----------------|---------|---------|---------|---------|--------|---------|---------|---------|---------|---------|---------|---------|---------|--------|--------|--------|--------|---------|---------|---------|---------|---------|---------|--------|----------------------|----------------------|---------|---------|--------|---------|----|---|----|
|                                   | HRTV-13         | HRTV-14 | HRTV-15 | HRTV-16 | HRTV-17 | HSTV-4 | HRTV-18 | HRTV-19 | HRTV-20 | HRTV-21 | HRTV-22 | HRTV-23 | HRTV-24 | HRTV-25 | HCTV-6 | HCTV-7 | HCTV-8 | HCTV-9 | HCTV-10 | HCTV-11 | HCTV-12 | HCTV-13 | HCTV-14 | HCTV-15 | HJTV-3 | HRTV-26 <sup>b</sup> | HRTV-27 <sup>b</sup> | HRTV-28 | HRTV-29 | HATV-3 | HCTV-16 |    |   |    |
| Virus                             | 1               | 2       | 3       | 4       | 5       | 6      | 7       | 8       | 9       | 10      | 11      | 12      | 13      | 14      | 15     | 16     | 17     | 18     | 19      | 20      | 21      | 22      | 23      | 24      | 25     | 26                   | 27                   | 28      | 29      | 30     | 31      |    |   |    |
| Host strain                       |                 |         |         |         |         |        |         |         |         |         |         |         |         |         |        |        |        |        |         |         |         |         |         |         |        |                      |                      |         |         |        |         |    |   |    |
| <i>Halorubrum</i> sp. SS10-3      | -2 <sup>a</sup> | -5      |         |         |         | 1      | H       | H       | 1       |         |         | -3      |         |         |        | -7     |        | -7     | -7      | -7      | -7      |         | -8      |         |        |                      |                      |         |         |        |         |    |   |    |
| <i>Halorubrum</i> sp. SS10-9      | -1              | 1       | +1      |         | 1       | 1      | -1      | -3      | H       | H       | H       | H       | H       | 1       | -1     | 1      | -1     | -1     | -1      | -1      | -1      | -1      | -1      | -6      | -2     |                      | -1                   | 1       | -10     |        |         |    |   |    |
| <i>Halorubrum</i> sp. SS13-12     |                 |         |         |         |         |        |         |         |         |         |         |         | H       |         |        |        |        |        |         |         |         |         |         |         |        |                      |                      |         |         |        |         |    |   |    |
| <i>Halorubrum</i> sp. SS6-1       |                 | -6      |         |         |         |        |         |         |         | -6      |         |         |         |         | -4     |        |        |        | -7      |         | -5      |         |         |         |        |                      |                      |         |         |        |         |    |   |    |
| <i>Halorubrum</i> sp. SS6-2       | -1              | H       | H       | H       |         | 1      | 1       | +1      | 1       | 1       |         | -1      | 1       | -1      | -1     | -3     | -4     | -4     | -4      | -3      | -3      | 1       | -3      | 1       | -6     | -1                   |                      |         |         |        |         |    |   |    |
| <i>Halorubrum</i> sp. SS7-4       |                 | -2      |         |         |         | 1      | 1       | -6      | -1      |         |         |         | -2      |         | -3     |        |        |        |         |         |         |         |         | -8      | -8     |                      |                      |         | -5      | H      | -4      | -7 |   |    |
| <i>Halorubrum</i> sp. SS8-2       | H               | -1      | -7      | -6      |         | -1     | -1      | 1       | -1      | -1      | 1       | 1       | 1       |         | -1     | +1     | +1     | +1     | 1       | 1       | 1       | -1      | 1       |         | -5     | -4                   |                      |         |         | -10    |         |    |   |    |
| <i>Halorubrum</i> sp. SS8-7       |                 |         |         |         |         | -4     | -4      | -6      | -2      | 1       |         |         |         |         | -8     | -1     | 1      | 1      | 1       | 1       | -2      | 1       | -2      | -1      | -5     | -1                   |                      |         | H       |        |         |    |   |    |
| <i>Halorubrum</i> sp. SS9-12      | -1              | 1       | -6      |         | H       | 1      | -1      | 1       | -1      | -1      | -1      | -1      | -1      | -1      |        |        | -7     | -7     |         | -7      | -7      |         | -8      | -8      | -7     | -1                   |                      |         |         |        |         |    |   |    |
| <i>Halorubrum</i> sp. SS5-4       |                 |         |         |         |         | -1     | -1      | 1       | 1       |         |         |         |         |         |        |        |        |        |         |         |         |         |         |         |        |                      |                      |         |         |        | -1      |    |   |    |
| <i>Halorubrum</i> sp. SP3-3       | -2              | -3      |         |         | -3      | +1     | -1      | -3      | -1      | 1       | -7      | -1      | -4      |         |        |        |        |        |         |         |         |         |         |         |        | -6                   | -1                   |         |         |        |         |    |   |    |
| <i>Halorubrum</i> sp. SS1-3       | 1               | -5      | -1      | -2      |         | 1      | 1       | 1       | 1       | 1       | 1       | 1       | 1       | 1       | 1      | -1     | 1      | 1      | 1       | 1       | 1       | -1      | -1      | 1       | 1      | -1                   | 1                    |         |         |        |         |    |   |    |
| <i>Halorubrum sodomense</i>       |                 | -1      |         | -6      |         | H      |         |         | -6      | 1       | -1      |         | -1      |         | 1      | 1      | +1     | +1     | 1       | 1       | 1       | 1       | 1       | 1       | 1      |                      | -1                   |         |         |        |         |    |   |    |
| <i>Haloterrigena</i> sp. SS13-7   |                 |         |         | 1       |         |        |         |         |         |         |         |         |         |         |        |        |        |        |         |         |         |         |         |         |        |                      |                      |         |         |        |         |    |   |    |
| <i>Halobacterium</i> sp. SS6-4    | -1              |         |         |         | 1       |        |         |         |         |         |         |         |         |         |        |        | 1      | 1      | 1       | -1      | 1       | 1       |         | -1      |        |                      |                      |         |         |        | -10     |    |   |    |
| <i>Halobacterium</i> sp. SS6-5    |                 |         |         |         |         | -5     |         |         |         | -5      |         |         |         |         |        |        | 1      |        |         |         | -8      | -8      |         | -1      |        |                      |                      |         |         |        |         |    |   |    |
| <i>Halobellus</i> sp. SS6-7       |                 |         |         |         |         |        |         |         |         |         |         |         |         |         |        |        | -1     | -1     |         |         |         | -1      | -1      |         | -1     |                      |                      |         |         |        |         |    |   |    |
| <i>Haloarcula</i> sp. SS8-4       | -2              | -1      |         |         | -1      | -1     | -3      |         |         |         |         |         |         |         |        | -1     |        |        |         |         |         |         | -1      |         |        | 1                    |                      |         |         |        |         |    |   |    |
| <i>Haloarcula</i> sp. SS8-5       |                 |         |         |         |         |        |         |         |         |         |         |         |         |         |        |        |        |        |         |         |         |         |         |         |        |                      |                      |         |         |        | -5      |    | H |    |
| " <i>Haloarcula californica</i> " |                 |         |         |         |         |        |         |         |         | -4      |         |         |         |         |        |        | H      | H      | H       | H       | H       | H       | H       | H       | H      |                      |                      |         |         |        |         |    | H |    |
| <i>Haloarcula japonica</i>        |                 |         |         |         |         |        |         |         |         |         |         |         |         |         |        |        |        |        |         |         |         |         |         |         |        | H                    |                      |         |         |        |         |    |   |    |
| <i>Haloarcula hispanica</i>       |                 |         |         |         |         |        |         |         |         |         |         |         |         |         |        |        |        |        |         |         |         |         |         |         |        |                      |                      |         |         |        |         |    |   | -5 |

**a:** The efficiency of plating (EOP) of the virus on its original isolation host has been set to one and marked with H. Number 1 is equal to the EOP on the original host. Numbers -1, -2,... refer to  $10^{-1}$ ,  $10^{-2}$ ,... and +1, +2,... refer to  $10^1$ ,  $10^2$ ,... when compared to the EOP on the original host; **b:** The host for viruses HRTV-26 and HRTV-27 is *Halorubrum* sp. SS13-13, which occasionally did not form a lawn, and consequently, it was left out from the cross-titration. The titers of HRTV-26 and HRTV-27 on *Halorubrum* sp. SS13-13 were  $2 \times 10^8$  and  $5 \times 10^6$  PFU ml<sup>-1</sup>, respectively, which were marked here as one and used here for comparison.

**Table S5.** Host range of pleomorphic and icosahedral viruses.

|                                   | HRPV-6    | HRPV-7         | HRPV-8    | HAPV-1    | HCIV-1    |
|-----------------------------------|-----------|----------------|-----------|-----------|-----------|
| <b>Virus number</b>               | <b>32</b> | <b>33</b>      | <b>34</b> | <b>35</b> | <b>36</b> |
| Host strain                       |           |                |           |           |           |
| <i>Halorubrum</i> sp. SS7-4       | H         | 1 <sup>a</sup> |           |           | -6        |
| <i>Halorubrum</i> sp. SS8-2       |           |                | -1        |           |           |
| <i>Halorubrum</i> sp. SS5-4       |           | H              |           |           |           |
| <i>Halorubrum</i> sp. SP3-3       |           |                | H         |           |           |
| <i>Haloarcula</i> sp. SS13-14     |           |                |           | H         |           |
| " <i>Haloarcula californiae</i> " |           |                |           |           | H         |
| <i>Haloarcula japonica</i>        |           |                |           |           | 1         |
| <i>Haloarcula hispanica</i>       |           |                |           |           | -6        |

**a.** The efficiency of plating (EOP) of the virus on its original host has been set to one and marked with H. Number 1 is equal to the EOP on the original host. Numbers -1, -2,... refer to  $10^{-1}$ ,  $10^{-2}$ ,... and +1, +2,... refer to  $10^1$ ,  $10^2$ ,... when compared to the EOP on the original host.

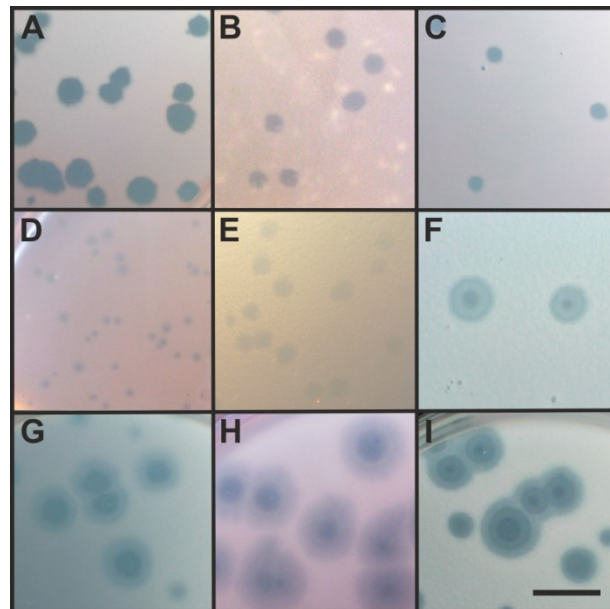

**Figure S1.** Different plaque morphologies. (A–C) Clear plaques; (D–I) turbid plaques. (A) Myovirus HRTV-22; (B) icosahedral virus HCIV-1; (C) myovirus HRTV-18; (D) siphovirus HRTV-29; (E) isolate No 37 with unknown morphotype; (F) myovirus HCTV-10; (G) myovirus HCTV-9; (H) pleomorphic virus HRPV-6; (I) myovirus HCTV-11. Scale bar, 1 cm for all sections.

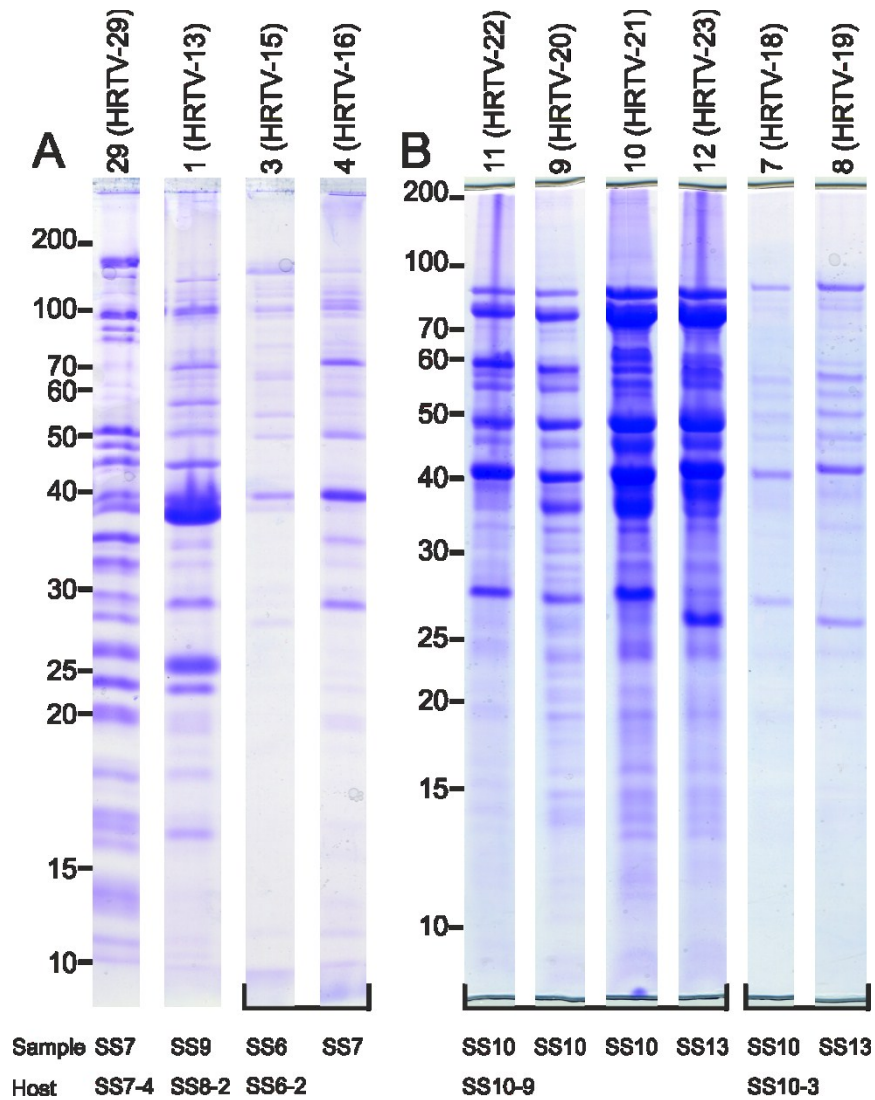

**Figure S2.** Structural protein profiles of the purified virus isolates analyzed in Coomassie Brilliant Blue stained tricine-SDS-polyacrylamid gel. Virus numbers refer to Table 1. (A) Examples of virus isolates with different protein profiles. Virus No. 29 is a siphovirus, Nos. 1, 3, and 4 are myoviruses; (B) Examples of myovirus isolates with closely related protein profiles. The molecular mass marker (kDa) is shown on the left in A and B. The origin (sample; see Supplementary Table S1) and the isolation of hosts (all belong to *Halorubrum*) of the viruses are shown below.
